# Supplementary material
Source: HighWire-hosted journal article supplement (https://n.neurology.org/content/suppl/2013/04/22/WNL.0b013e31826e25ce)
Supplement: samier.pdf [file samier.pdf]

# 노인 코호트에서 신경이완제 복용 과거력과 파킨슨병의 위험도

## Past exposure to neuroleptic drugs and risk of Parkinson disease in an elderly cohort

Alexandra Foubert-Samier, MD  
 Catherine Helmer, MD, PhD  
 Florian Perez, MD  
 Me'lanie Le Goff, MSc  
 Sophie Auriacombe, MD  
 Alexis Elbaz, MD, PhD  
 Jean-Francois Dartigues, MD, PhD  
 Francois Tison, MD, PhD

**목적:** 신경이완제(neuroleptics)와 그 유사약제는 파킨슨증을 유발하는 것으로 알려져 있으며 몇몇 경우에는 숨어 있는 파킨슨병(Parkinson disease, PD)을 임상적으로 드러내는 효과가 있는 것으로 알려졌다. 우리는 15년에 걸친 인구기반 노인 코호트 연구를 통해 이러한 약물에 노출된 후 PD가 발생하는 장기적 위험도를 평가하였다.

**방법:** PD 발생의 위험도와 neuroleptics 노출 기왕력의 관계를 알아보기 위해 Cox 비례위험모형을 사용하였다. 파킨슨증이 발생한 모든 사례에 대해서 표준화된 절차와 전문가위원회의 인증을 통해 확인하였다.

**결과:** 2,991명을 추적관찰한 결과 이 중 117명에서 파킨슨증이 발생하였으며 43명은 PD의 가능성(probable PD)이 있는 것으로 나타났으며, 이들 중 각각 22.2%와 32.6%가 neuroleptics에 노출되었던 적이 있던 것으로 나타났다. 파킨슨증이 안 나타난 대상자의 16.6%에서 neuroleptics에 노출되었던 적이 있던 것으로 나타났다. 환자의 1/3에서 약물에 노출된 기간 동안 일시적인 파킨슨증을 나타냈다. 성별과 과거직업에 대해 보정하였을 때, 과거 neuroleptics 노출은 PD의 발생과 관계가 있었다(RR, 3.16; 95% CI, 1.65~6.04). Benzamides의 RR은 3.65 (95% CI, 1.41~9.45)이었고 phenothiazines의 RR은 2.59 (95% CI, 1.23~5.43)이었다. PD 발생에 대한 benzamides의 기여위험도(population-attributable fraction)는 8.2%이었고 phenothiazines은 12.2%이었다.

**결론:** 프랑스 노인 코호트에서 neuroleptics에 노출된 후 PD 가능성의 위험도가 3.2배 증가하였다. 이 결과는 노인인구에서 이러한 약제의 사용을 제한해야 함을 시사한다.

Neurology® 2012;79:1615-1621

| Drugs            | Parkinsonism cases <sup>b</sup> (n = 116), adjusted model |         | Probable Parkinson disease (n = 43), adjusted model |         |
|------------------|-----------------------------------------------------------|---------|-----------------------------------------------------|---------|
|                  | RR (95% CI)                                               | p Value | RR (95% CI)                                         | p Value |
| All neuroleptics | 1.65 (1.05-2.58)                                          | 0.03    | 3.16 (1.65-6.04)                                    | 0.0005  |
| Phenothiazines   | 1.48 (0.88-2.49)                                          | 0.14    | 2.59 (1.23-5.43)                                    | 0.01    |
| Benzamides       | 2.05 (0.99-4.24)                                          | 0.05    | 3.65 (1.41-9.45)                                    | 0.008   |

Abbreviations: CI = confidence interval; RR = relative risk.

<sup>a</sup> Models were adjusted for sex and occupation.

<sup>b</sup> For one subject with parkinsonism, data on occupation were missing.
